# Supplementary material for: Identification of Anti-Influenza A Compounds Inhibiting the Viral Non-Structural Protein 1 (NS1) Using a Type I Interferon-Driven Screening Strategy
Source: MDPI journal article supplement (doi:10.3390/ijms241310495), 2023-06-22

## Supporting information

**Table S1.** ID, supplier code and structure of the 84 screened compounds composing the diverse library.

|                                                                                                                      |                                                                                                                      |                                                                                                                        |
|----------------------------------------------------------------------------------------------------------------------|----------------------------------------------------------------------------------------------------------------------|------------------------------------------------------------------------------------------------------------------------|
| <p><b>153</b><br/>T0340-1456</p> 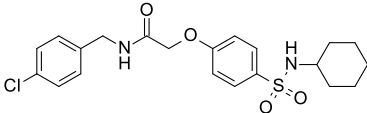   | <p><b>154</b><br/>T0306-9137</p>    | <p><b>155</b><br/>T0505-5794</p>    |
| <p><b>156</b><br/>T0366-3184</p>   | <p><b>157</b><br/>T0506-5281</p>   | <p><b>158</b><br/>T0511-0248</p>   |
| <p><b>159</b><br/>T0511-8649</p>  | <p><b>160</b><br/>T0515-0254</p>  | <p><b>161</b><br/>T0518-2424</p>  |
|                                                                                                                      |                                                                                                                      |                                                                                                                        |

|                                                                                                                           |                                                                                                                           |                                                                                                                             |
|---------------------------------------------------------------------------------------------------------------------------|---------------------------------------------------------------------------------------------------------------------------|-----------------------------------------------------------------------------------------------------------------------------|
| <p><b>162</b><br/><i>T0316-6988</i></p> 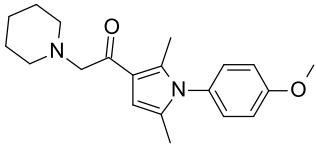 | <p><b>163</b><br/><i>T0520-9292</i></p>  | <p><b>164</b><br/><i>T0301-3213</i></p>  |
| <p><b>165</b><br/><i>T5263448</i></p>    | <p><b>166</b><br/><i>T5272509</i></p>    | <p><b>167</b><br/><i>T5284258</i></p>    |
| <p><b>168</b><br/><i>T5305571</i></p>  | <p><b>169</b><br/><i>T5308219</i></p>   | <p><b>170</b><br/><i>T5316287</i></p>   |
| <p><b>171</b><br/><i>T5316819</i></p>  | <p><b>172</b><br/><i>T5318448</i></p>  | <p><b>173</b><br/><i>T5329791</i></p>  |
|                                                                                                                           |                                                                                                                           |                                                                                                                             |

**174**  
*T5330349*

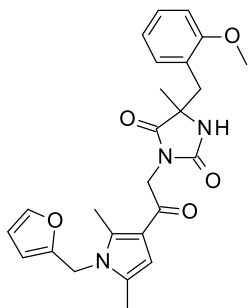

**175**  
*T5335333*

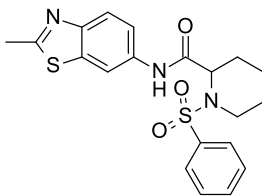

**176**  
*T5393793*

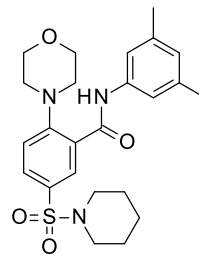

**177**  
*T5396052*

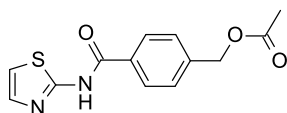

**178**  
*T5450172*

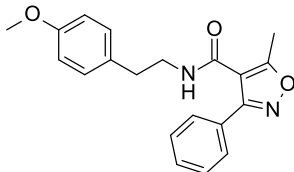

**179**  
*T5460509*

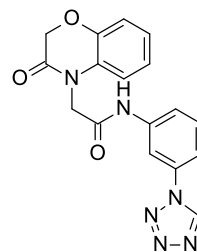

**180**  
*T5460611*

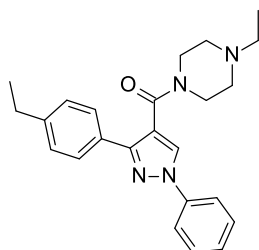

**181**  
*T0358-2870*

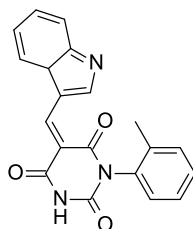

**182**  
*T5465380*

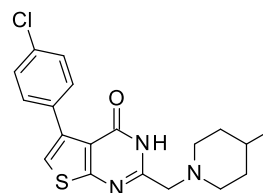

**183**  
*T5558390*

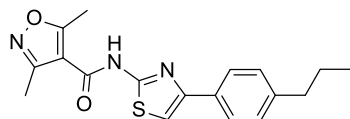

**184**  
*T5377312*

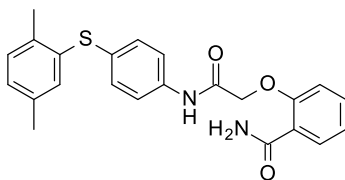

**185**  
*T5570620*

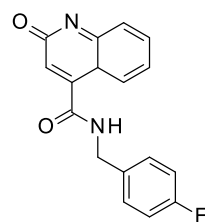

**186**  
*T5571734*

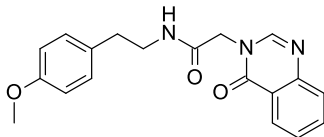

**187**  
*T5594464*

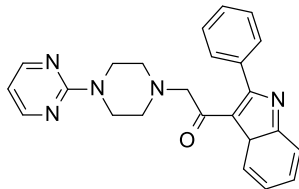

**188**  
*T5603735*

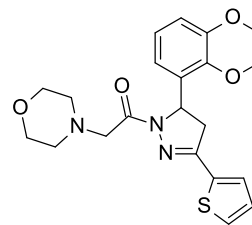

**189**  
*T1329-3854*

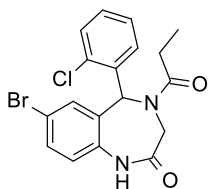

**190**  
*T5635981*

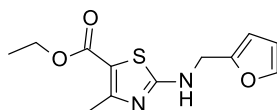

**191**  
*T5622820*

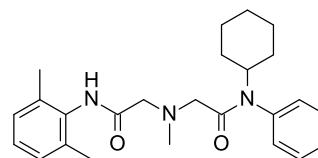

**192**  
*T5661504*

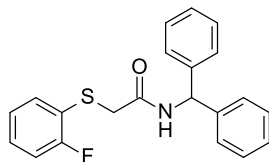

**193**  
*T5659078*

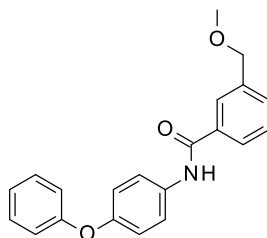

**194**  
*T5687563*

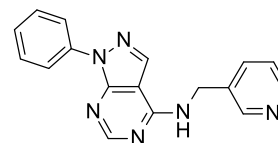

**195**  
*T5719429*

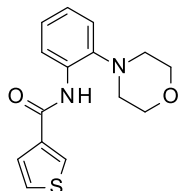

**196**  
*T5722483*

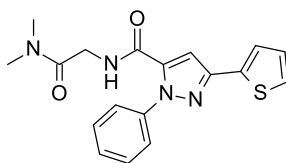

**197**  
*T1305-9117*

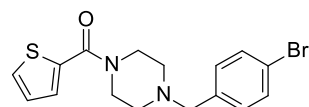

**198**  
T5724349

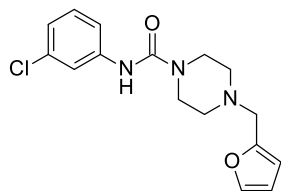

**199**  
T0391-8750

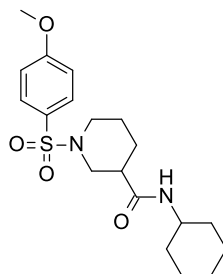

**200**  
T0376-3307

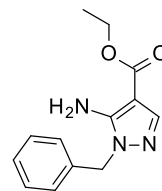

**201**  
T5804390

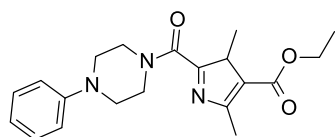

**202**  
T5879448

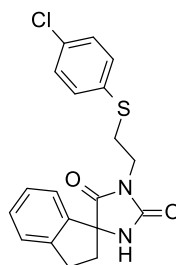

**203**  
T5883275

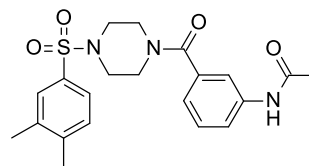

**204**  
T5928450

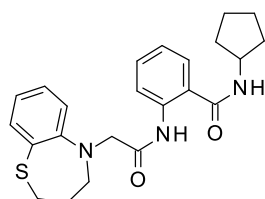

**205**  
T5956270

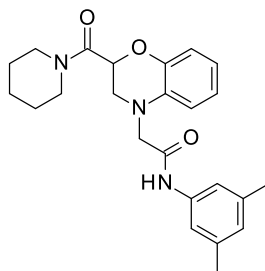

**206**  
T0335-3920

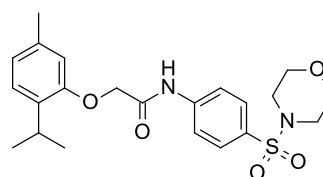

**207**  
T6075418

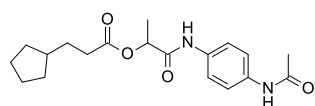

**208**  
T6111920

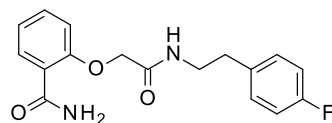

**209**  
T6117467

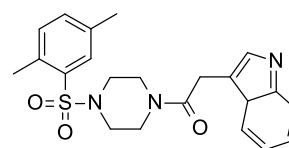

**210**  
*T6246601*

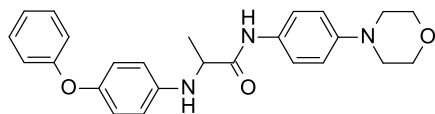

**211**  
*T6285788*

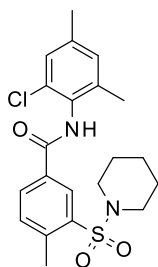

**212**  
*T6304972*

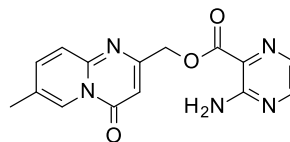

**213**  
*T6310799*

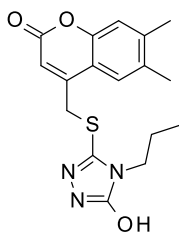

**214**  
*T6317162*

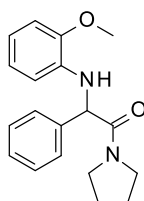

**215**  
*T6327498*

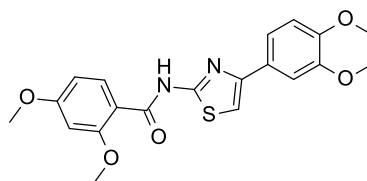

**216**  
*T6421291*

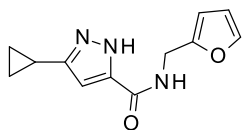

**217**  
*T0319-8439*

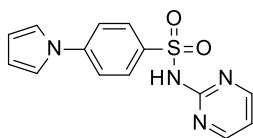

**218**  
*T5985309*

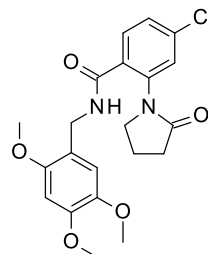

**219**  
*T6568785*

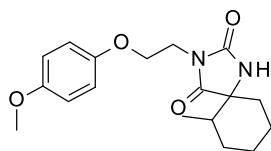

**220**  
*T6586890*

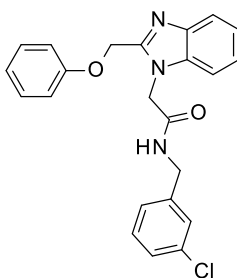

**221**  
*T5890666*

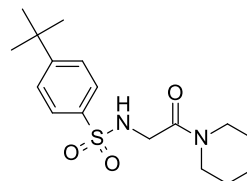

**222**  
*T5889788*

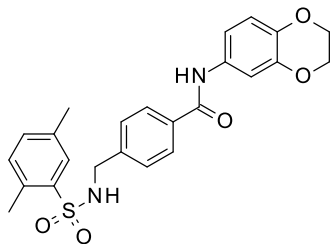

**223**  
*T5389018*

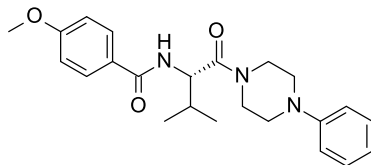

**224**  
*T5437635*

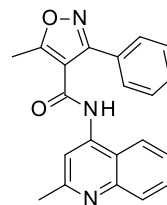

**225**  
*T0508-2915*

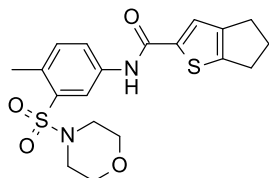

**226**  
*T0518-5559*

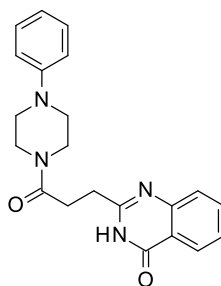

**227**  
*T5264829*

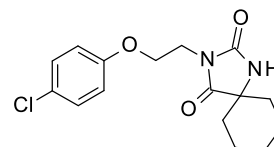

**228**  
*T1323-1121*

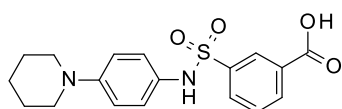

**229**  
*T5540131*

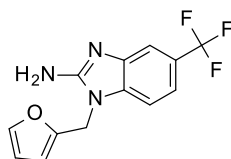

**230**  
*T5562138*

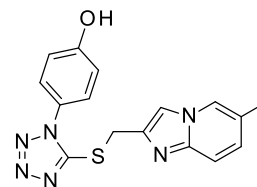

**231**  
*T5291479*

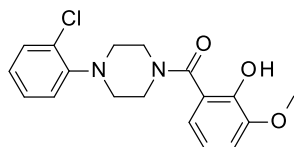

**232**  
*T6506923*

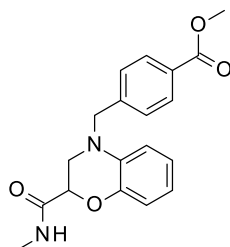

**233**  
*T6602344*

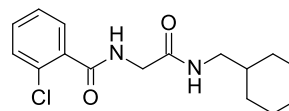

**234**  
*T0322-9346*

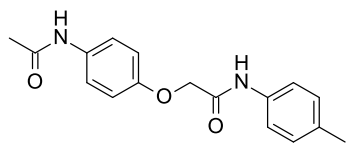

**235**  
*T5288693*

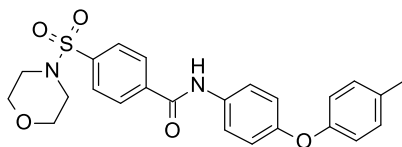

**236**  
*T0327-2587*

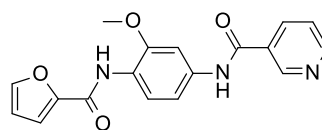

Supplement: s1 [file s1]
