# Supplementary material for: Identification of Anti-Influenza A Compounds Inhibiting the Viral Non-Structural Protein 1 (NS1) Using a Type I Interferon-Driven Screening Strategy
Source: MDPI journal article supplement (doi:10.3390/ijms241310495), 2023-06-22
Supplement: s1 [file s1]

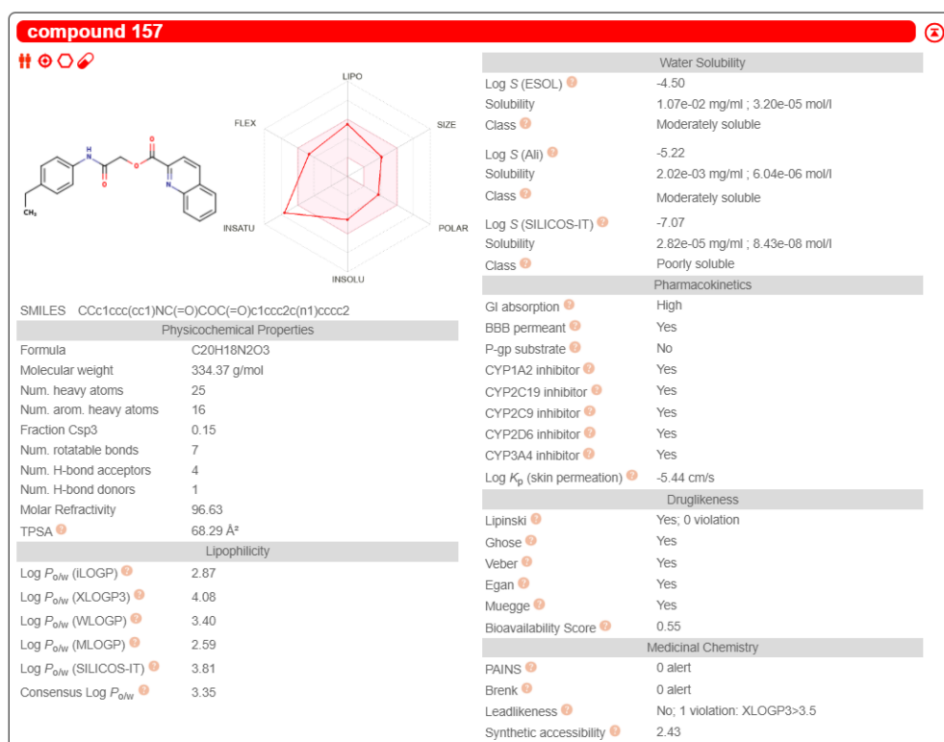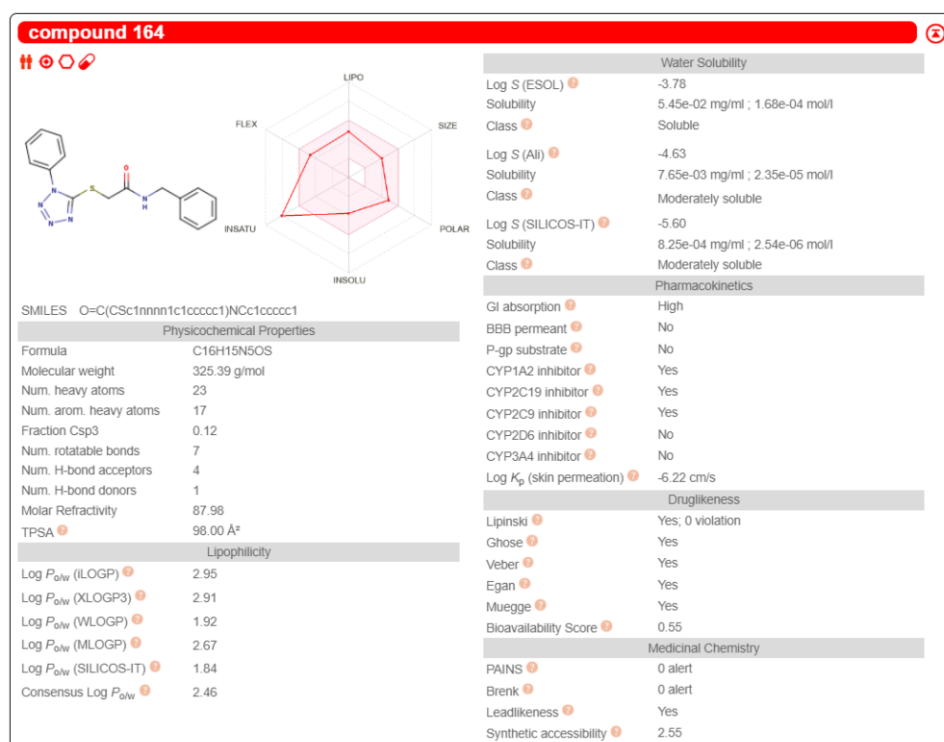

**Figure S1.** Prediction of ADME profile and physicochemical and pharmacokinetic properties of compounds 157 and 164.
